# Supplementary material for: ‘Telehealth for all’: capitalising on the power of virtual healthcare for persons with disability in India
Source: Research Square preprint supplement (doi:10.21203/rs.3.rs-7461742/v1), 2025-09-30
Supplement: Supplementary file 1 [file 38cfb5d4e91cdc2afa3a9e96.docx]

**VirtuCare Semi-Structured Interview Tools (PwDs who have and have not used telemedicine)**

| **S.No.** | **Information** | **Answers** |
| --- | --- | --- |
| 1 | Name of the interviewer |  |
| 2 | Name of the respondent |  |
| 3 | Age of the respondent |  |
| 4 | Who is taking the interview? (Respondent, proxy, caregiver) |  |
| 5 | Date |  |
| 6 | Location |  |
| 7 | Language |  |

**Introduction:**

- Step-1 PIS and consent obtained
- Step-2 icebreakers and making the participant feel comfortable
- Step-3 general personal data round and a conversation on their daily life

Demographic Information:

- Can you please tell me your name?
- What is your occupation?
- What is your highest level of education?
- Are you married or single?

The interview is about telemedicine, its applications, uptake, and challenges for PwDs

1. Do you have a health condition for which you are currently taking treatment?
2. Can you tell me about the different ways you are seeking care?
3. Did you use any telehealth services for treatment or disability management?
4. Do you know what tele services are provided by the government sector? (if yes, ask them what they are using, if no, ask them if they are willing to seek it)
5. Do you know what tele services are provided by the private sector? (if yes, ask them what they are using, if no, ask them if they are willing to seek it)
6. Are you registered with the UDID or ABHA number?
7. Have you used or come across any helpline numbers or information services that use telehealth? Where did you learn about it?

**Access:**

1. What centres did you/ you think you can access telehealth services from?
2. Did COVID-19 push you towards accessing these services? Do you still use these services?
3. Can you tell me about how the entire session of teleconsultation was?

Prompt: did you use mics, speakers, cameras, etc.?

1. If you did not use it or did not need telehealth services, can you please tell me why you have not used the service?
2. Based on your experience in the recent past, will you prefer to use tele health services in the future? (ask those who have used it and those who would like to use them)

**Preferences/ comfort with care**

1. How accessible is the platform for you given your disability?
2. Can you tell me about your experience booking the consultation?

Prompt: was it difficult?

1. How satisfied are you with the teleconsultation as a PwD?
2. Do you think your healthcare needs can be addressed remotely? What services do you think you can access remotely as a PwD (general or disability-specific) (for those who did not use it or did not need it)
3. How did you set up the environment for the teleconsultation?

Promt: have you had any challenges setting it up given your disability?

Did you face challenges setting up or using mics, speakers, cameras, etc?

1. What do you think are the benefits of telehealth for a PwD?

Prompt: did it increase timeliness of care?

Did it cut down on travel and travel costs?

1. Did the PwD/ You feel comfortable talking to the provider and were you able to share all the details given your disability?
2. Are the consultations flexible with your timings? Did the timing cause any delay in seeking care?
3. Have you had any concerns about privacy or security while participating in teleconsultation sessions? Or what
4. do you think about privacy and security during a teleconsultation for a PwD?
5. Did you receive enough support for what you were seeking care for?
6. How was the attitude of the staff that assisted you during the teleconsultation?

**Barriers:**

1. Did you face/ think you will face any challenges with the platform given your disability?
2. Were you able to get the same attention and support through your care provider?
3. Did the cost of teleconsultation influence your decision to access it? Did you have any extra costs for setting up the environment given your disability? Did the disability add to the cost of accessing telehealth services (had to buy mics, speakers, screens, computer, etc.)

**Knowledge:**

1. How did you hear about telehealth?
2. Were you provided with any training before the teleconsultation? (for those who accessed) or do you think training before the teleconsultation would be helpful for a PwD? (for those who didn’t use or need it) can you explain about it?
3. What components of teleconsultation do you think can be modified to make it more inclusive? (explain to them the different kinds of telehealth services that are being provided)
4. What do you think of quality of care during teleconsultations when compared to in-person visits?
5. Do you have any other suggestions or questions for us?

**Caregiver’s perspective (caregivers driving the teleconsultation)**

**Introduction:**

1. Can you tell us about the person you care for and their disability?
2. What are the services you provide for the person being cared for?
3. What do you do when you need to get medical attention for the person being cared for?
4. What services can be accessed remotely?
5. Do you know what services the government provides remotely?
6. Do you know what services are provided by the private sector remotely?
7. Do you know what services are provided by the NGOs remotely?
8. Is the person you are caring for registered with an ABHA number?
9. Have you used or come across any helpline numbers or information services that use telehealth? Where did you learn about it?
10. How did you explain the telehealth mechanism to the person being cared for? What was his/her reaction towards it?

**Access:**

1. If yes, what do you use the consultation for?
2. When did you start using these services?
3. Do you still use these services?
   1. If not, do you think you could have accessed health remotely? Can you please tell me why you have not used the services?
4. What centres do you/ can you access telehealth services from?
5. Can you tell me about your experience booking the consultation?

Prompt: was it difficult?

1. What equipment do you need/ would need for your consultation given the disability? Is the person receiving the care facing / will face any barriers using this equipment?

**Preferences/ comfort of care**

1. How satisfied are you with the teleconsultation given the disability of the person being cared for?
2. What do you think are the benefits of telehealth to PwDs?

Prompt: did it increase timeliness of care?

Did it cut down on travel and travel costs?

1. How did you set up the environment for the teleconsultation given their disability?

Promt: have you had any challenges setting it up?

Did you face challenges setting up or using mics, speakers, cameras, etc?

1. Was the PwD satisfied accessing care through the home? Are the consultations flexible with their timings? Did the timing cause any delay in seeking care?
2. Was there any activity where the child/ PwD found it difficult to participate in the session?
3. Did the PwD feel comfortable talking to the provider and were you able to share all the details?
4. Have you had any concerns about privacy or security while participating in teleconsultation sessions? Or what do you think about privacy and security during a teleconsultation for a PwD?
5. What do you think of the attitude of the staff that was providing the teleconsultation?

**Barriers**

1. Do you face / will face any challenges to follow or explain the suggestions post-consultation to the PwD? With regards to medications, disease management, other guidelines, etc.
2. Do you think there was/ will be a gap in explaining the person receiving the care’s problem to the specialist given their disability?
3. Did the cost of teleconsultation influence your decision to access it? Did you have any extra costs for setting up the environment? (mics, speakers, screens, computer, etc.)
4. What components of teleconsultation do you think can be modified to make it more inclusive? (explain to them the different kinds of telehealth services that are being provided)
5. What do you think of quality of care for PwD during teleconsultations when compared to in-person visits?
6. Do you have any other suggestions for us?

**Focus Group Discussion Guide for users of Telehealth Services**

| **Name of surveyor(s)** |  |
| --- | --- |
| **Date of FGD** |  |
| **Name of the place** |  |
| **No. of people attending the FGD** | Men  Women  Total |
| **Type of FGD** | 1. Beneficiaries 2. Providers 3. Community Representatives |

**Focus Group Discussion Guide for users**

**Study Title:** VirtuCare Project

**Principal Investigator:** Prof GVS Murthy

**IRB No.:**

**PI version Date:** Apr 23

We would like to see if you might be willing to participate in a focus group discussion to help us identify some of the areas where inclusive telehealth can be strategically enhanced. If you say yes, we’d like to use this focus group to ask you about the telehealth services that you have used or heard of. This discussion may continue for about 50 – 90 minutes.

-Can we all take some time to have a brief introduction? We can start with details on name, age and your designation.

**Title: FGD tool for people who used telehealth services**

1. What is your experience of telehealth as a person with a disability?

Probes:

1. What do you think about telemedicine for PwDs?
2. How did you find out about different services that can be accessed remotely for a PwD?
3. How much support does a PwD need to access these services?

2. What are the reasons that influence PwDs to want to access remote care?

Probes:

a. Does your disability make it difficult to access care remotely?

b. What do you think about using screens, computers, mics, speakers, cameras etc. for teleconsultations as a PwD?

c. Did telehealth make follow-ups more accessible?

d. Were there any financial benefits or challenges accessing care because of your disability?

3. What are the benefits of seeking healthcare services remotely?

Probes:

1. As a person with a disability how satisfied are you with telehealth? What do you think of quality of care during teleconsultations when compared to in-person visits?
2. Was your disability taken into account during the teleconsultation?
3. Did you feel comfortable talking to the provider and were you able to share all the details?
4. How was the teleconsultation made accessible to you?

4. Please tell me about organizations that provide care remotely

Government: have you used these services? What were the services that you used? Where did you hear about them? At what levels did you receive them? (primary, secondary and tertiary care facilities)

NGOs: have you used these services? What were the services that you used? Where did you hear about them?

Private: have you used these services? What were the services that you used? Where did you hear about them?

5. Please tell me about any challenges that you experienced in accessing/utilizing these services remotely because of your disability

Probes

a. Have you noticed any differences in the quality of care through in-person services and telehealth services?

b. Were you able to get the same attention and support through your care provider?

c. How did you feel about the privacy and security of your personal information on disability during the teleconsultation?

d. Did you encounter any technical difficulties because of your disability during the consultation? How were they handled?

6. What components of teleconsultation do you think can be modified to make it more inclusive?

7. What do you think would make telehealth more accessible and inclusive for PwDs?

a. Would it be useful or not? And why?

b. What kind of services would you like to use?

c. Do you think training would be needed before teleconsultations for PwDs?

8. Would you like to add anything more on this topic?
